# Supplementary material
Source: PubMed Central journal article supplement (PMC3408207)
Supplement: supp_M112.375907_Figure_S1.pdf [file supp_M112.375907_Figure_S1.pdf]

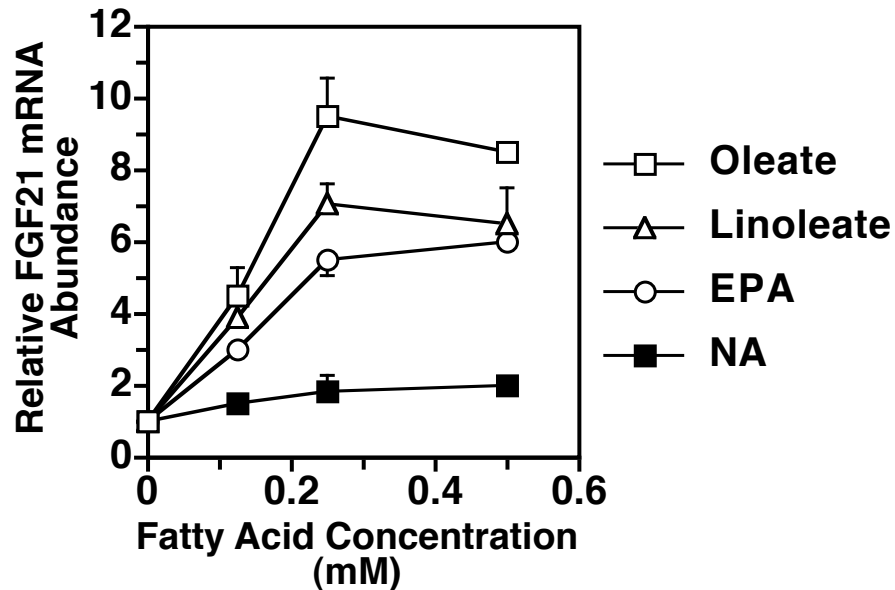

**Fig. S1. Effect of different concentrations of oleate, linoleate, and EPA on FGF21 mRNA abundance in primary rat hepatocyte cultures.** Cells were incubated with the indicated concentrations of fatty acids complexed to BSA. Hepatocytes receiving no additions (NA) were incubated in medium containing an equivalent concentration of BSA. After 2 h of treatment, total RNA was isolated and FGF21 mRNA abundance was measured. The level of FGF21 mRNA in cells incubated with fatty acids for 0 h was set at 1, and the other values were adjusted proportionately. Values are means  $\pm$  S.E. of three experiments.
