# Supplementary material
Source: PubMed Central journal article supplement (PMC3408207)
Supplement: supp_M112.375907_Table_S1.pdf [file supp_M112.375907_Table_S1.pdf]

**Table S1**

**Primers Used in Quantitative Real Time-PCR Analysis**

| <u>mRNA</u>                                    | <u>Primers</u>                                                               |
|------------------------------------------------|------------------------------------------------------------------------------|
| Rat FGF-21                                     | U: AGC TGC TGC TTA AGG ACG GAT ACA<br>D: CTT GCA AAG GCT CTA CCA TGC TCA     |
| Rat cyclophilin                                | U: CGT GGG CTC CGT TGT CTT<br>D: TGA CTT TAG GTC CCT TCT TCT TAT CG          |
| Human FGF-21                                   | U: ACC AGA GCC CCG AAA GTC<br>D: CTT GAC TCC CAA GAT TTG AAT AAC TC          |
| Human glyceraldehyde 3-phosphate dehydrogenase | U: GTC ATC ATC TCT GCC CCC TCT GCT G<br>D: CGA CGC CTG CTT CAC CAC CTT CTT G |
| Mouse FGF-21                                   | U: ACC TGG AGA TCA GGG AGG AT<br>D: CAC CCA GGA TTT GAA TGA CC               |
| Mouse BSEP                                     | U: ACA GAA GCA AAG GGT AGC CAT C<br>D: GGT AGC CAT GTC CAG AAG CAG           |
| Mouse 36B4                                     | U: GGC CCG AGA AGA CCT CCT T<br>D: TCA ATG GTG CCT CTG GAG ATT               |
